# Supplementary material for: Supratentorial ependymoma in childhood: more than just RELA or YAP
Source: PubMed Central journal article supplement (PMC7882569; doi:10.1007/s00401-020-02260-5), 2021-01-22
Supplement: 401_2020_2260_MOESM1_ESM.pdf [file 401_2020_2260_MOESM1_ESM.pdf]

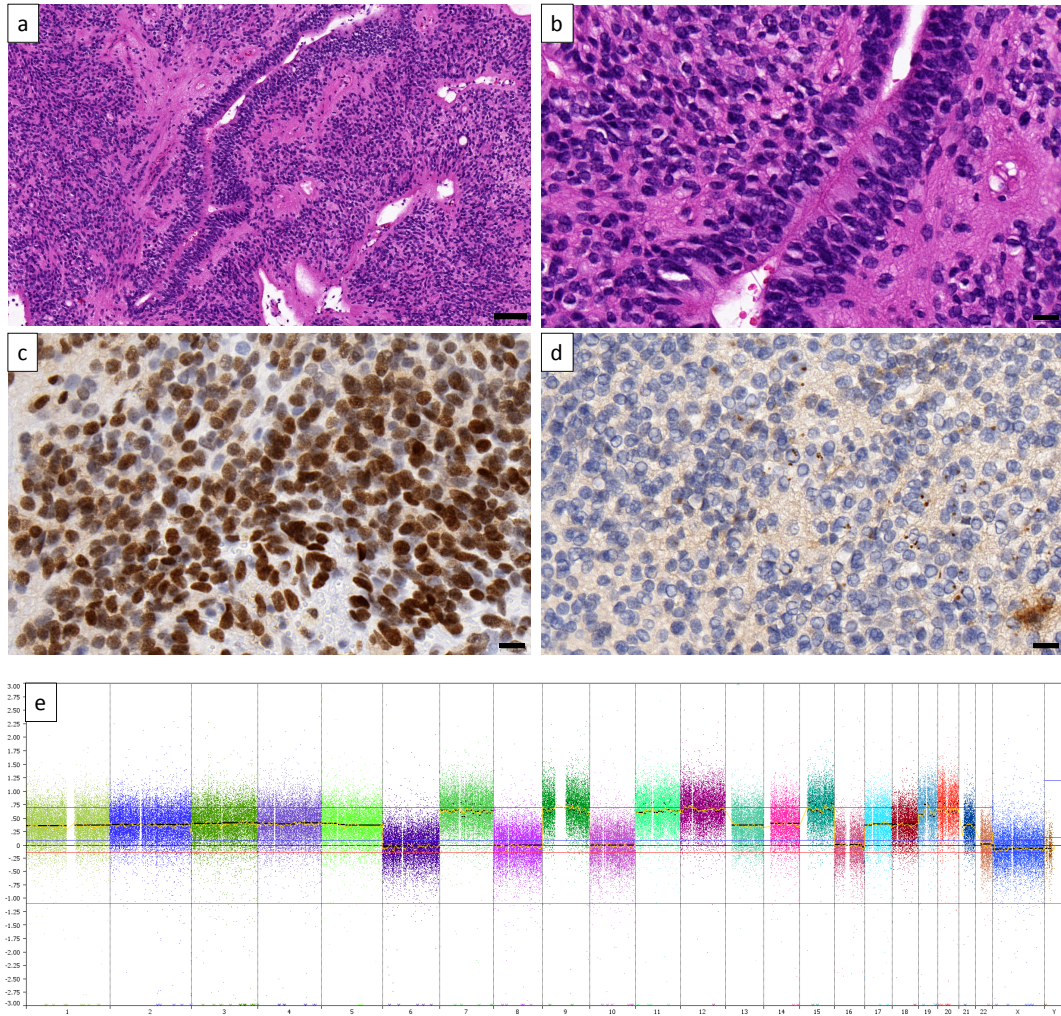

### Supplementary Figure 1.

Histological and genetic characteristics of case 18.

**a, b** HE stains of case 18 (PFB) showing a densely cellular tumor with round to oval cell nuclei and eosinophilic cytoplasm. **c** retained K27-trimethylation of histone 3 lysine (H3K27me<sup>3</sup>). **d** dot-like protein expression of epithelial membrane antigen. **e** copy number profile of case 18 highlighting the typical polyploid phenotype with multiple copy number gains. (*scale bar in a: 50 μm, scale bars in b, c, d: 20 μm*)

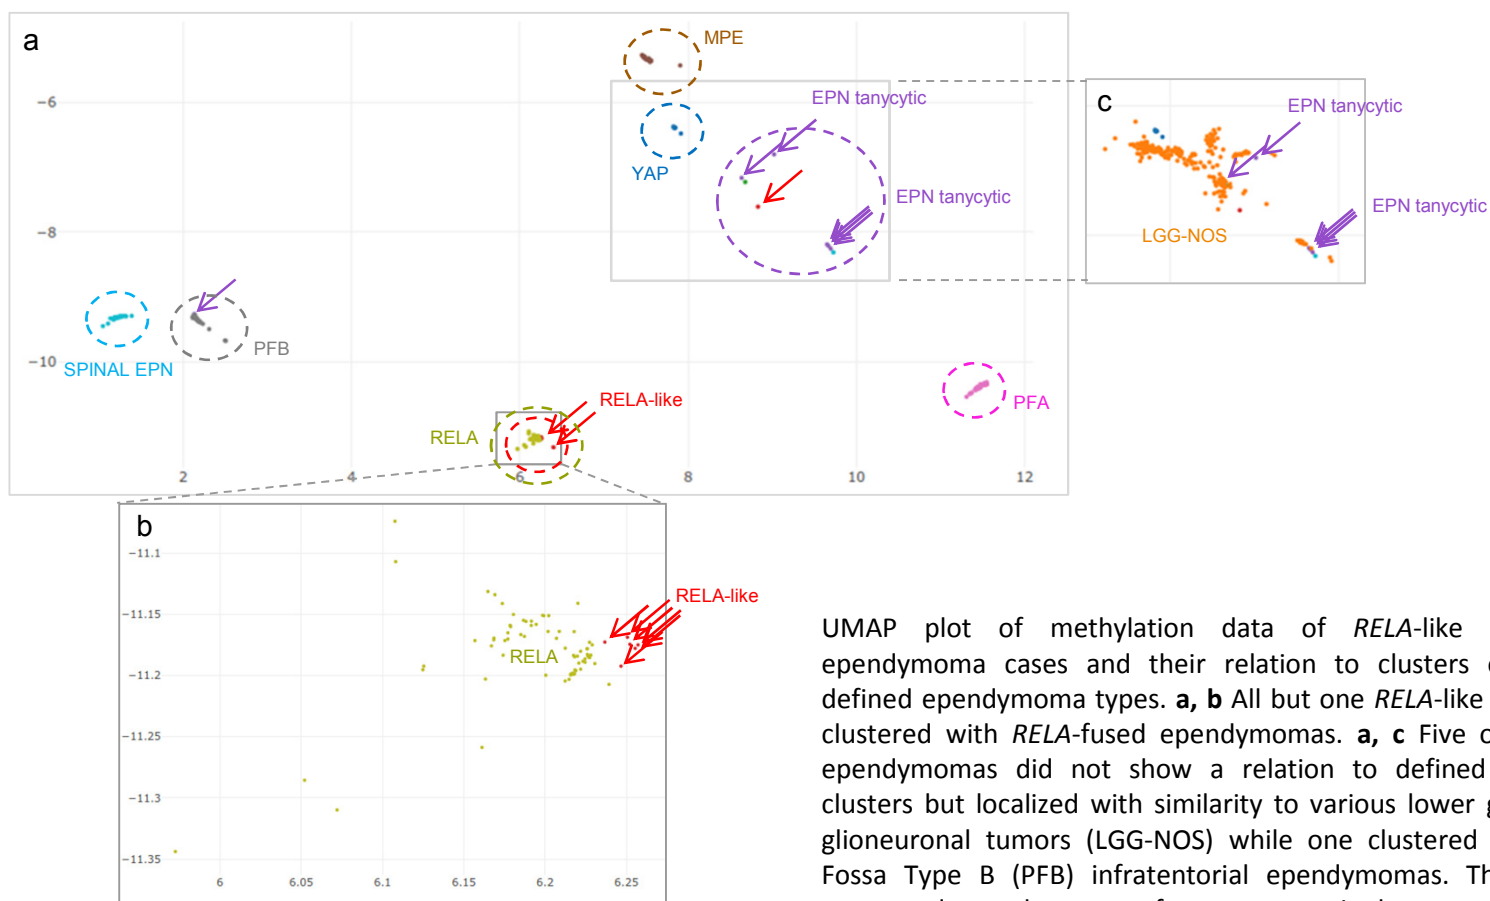

UMAP plot of methylation data of *RELA*-like and tanyctic ependymoma cases and their relation to clusters of molecularly defined ependymoma types. **a, b** All but one *RELA*-like ependymomas clustered with *RELA*-fused ependymomas. **a, c** Five of six tanyctic ependymomas did not show a relation to defined ependymoma clusters but localized with similarity to various lower grade glial and glioneuronal tumors (LGG-NOS) while one clustered with Posterior Fossa Type B (PFB) infratentorial ependymomas. The majority of annotated ependymoma references cases is the same as in the brain tumor methylation classifier reference set v11b2. **b** shows the UMAP plot region of *RELA*/*RELA*-like tumors at higher magnification; **c** shows the location of supratentorial tanyctic ependymomas in relation to low-grade gliomas (masked in **a**). *RELA*, *RELA*-fused ependymoma; *RELA*-like, supratentorial *RELA*-like ependymomas, EPN-tanyctic, supratentorial tanyctic ependymoma; MPE, myxopapillary ependymoma; PFA, posterior fossa type A ependymoma; PFB, posterior fossa type B ependymoma; SPINAL EPN, spinal ependymoma; YAP, *YAP*-fused ependymoma; LGG-NOS, low grade glioma, not otherwise specified.

Supplementary Figure 2

| Age at dx (years) | Gender | Location | Histology                  | WHO grade          | Nuclear p65-RelA | Methylation-based classification | Gene Fusions                                                                         | Integrated Diagnosis       | Treatment                      | EFS (years)                         | Event | OS (years) | OS status | Study reference   | Study Case No.   |    |
|-------------------|--------|----------|----------------------------|--------------------|------------------|----------------------------------|--------------------------------------------------------------------------------------|----------------------------|--------------------------------|-------------------------------------|-------|------------|-----------|-------------------|------------------|----|
| 1                 | 1      | n.a.     | thalamic -intraventricular | classic            | III              | negative                         | EPN, RELA                                                                            | no fusion                  | non-RELA/non-YAP EP            | Chemotherapy                        | n.a.  | n.a.       | n.a.      | n.a.              | Pages et al [16] | 23 |
| 2                 | 1      | n.a.     | tectal                     | classic            | III              | negative                         | undetermined                                                                         | n.a.                       | non-RELA/non-YAP EP            | Irradiation and chemotherapy        | n.a.  | n.a.       | n.a.      | n.a.              | Pages et al [16] | 24 |
| 3                 | 8      | n.a.     | frontal                    | classic            | III              | negative                         | undetermined                                                                         | MAML2-ASCL2                | non-RELA/non-YAP EP            | Chemotherapy                        | n.a.  | n.a.       | n.a.      | n.a.              | Pages et al [16] | 25 |
| 4                 | 10     | n.a.     | 3 <sup>rd</sup> ventricle  | classic            | III              | negative                         | undetermined                                                                         | MARK2-ADCY3                | non-RELA/non-YAP EP            | Irradiation                         | n.a.  | n.a.       | n.a.      | n.a.              | Pages et al [16] | 34 |
| 5                 | 11     | n.a.     | parieto-temporal           | papillary          | III              | negative                         | undetermined                                                                         | n.a.                       | non-RELA/non-YAP EP            | Irradiation and chemotherapy        | n.a.  | n.a.       | n.a.      | n.a.              | Pages et al [16] | 35 |
| 6                 | 2      | n.a.     | frontal                    | classic            | III              | n.a.                             | n.a.                                                                                 | n.a.                       | non-RELA/non-YAP EP            | None                                | n.a.  | n.a.       | n.a.      | n.a.              | Pages et al [16] | 36 |
| 7                 | 56     | m        | temporal                   | n.a.               | III              | n.a.                             | no match (low score for glioblastoma, IDH wildtype, subclass RTK II, 0.51)           | n.a.                       | ST EP                          | n.a.                                | n.a.  | n.a.       | n.a.      | Fukuoka et al [5] | EP032            |    |
| 8                 | 4      | f        | occipital                  | n.a.               | II               | n.a.                             | no match                                                                             | n.a.                       | ST EP                          | n.a.                                | n.a.  | n.a.       | n.a.      | Fukuoka et al [5] | EP037            |    |
| 9                 | 2      | m        | parietal                   | n.a.               | III              | n.a.                             | no match                                                                             | n.a.                       | ST EP                          | n.a.                                | n.a.  | n.a.       | n.a.      | Fukuoka et al [5] | EP092            |    |
| 10                | 60     | f        | n.a.                       | n.a.               | II               | n.a.                             | ependymoma, posterior fossa group A                                                  | n.a.                       | ST EP                          | n.a.                                | n.a.  | n.a.       | n.a.      | Fukuoka et al [5] | EP097            |    |
| 11                | 3      | f        | frontal                    | n.a.               | III              | n.a.                             | CNS neuroblastoma with FOXR2 activation                                              | n.a.                       | ST EP                          | n.a.                                | n.a.  | n.a.       | n.a.      | Fukuoka et al [5] | EP125            |    |
| 12                | 22     | m        | occipital                  | n.a.               | II               | n.a.                             | no match (low score for ependymoma, posterior fossa group B, 0.44)                   | FOXO1-STK24                | ST EP with FOXO-STK24 fusion   | n.a.                                | n.a.  | n.a.       | n.a.      | Fukuoka et al [5] | EP057            |    |
| 13                | 45     | m        | n.a.                       | n.a.               | II               | n.a.                             | no match                                                                             | n.a.                       | ST EP with TERT mutation       | n.a.                                | n.a.  | n.a.       | n.a.      | Fukuoka et al [5] | EP050            |    |
| 14                | 7,2    | f        | supratentorial             | n.a.               | n.a.             | n.a.                             | n.a.                                                                                 | C11orf95-YAP1, MYO7A-SESN3 | n.a.                           | n.a.                                | n.a.  | n.a.       | n.a.      | Parker et al [18] | 16               |    |
| 15                | 2,4    | f        | supratentorial             | n.a.               | n.a.             | n.a.                             | n.a.                                                                                 | C11orf95-MAML2             | n.a.                           | n.a.                                | n.a.  | n.a.       | n.a.      | Parker et al [18] | 17               |    |
| 16                | 12,8   | m        | 3rd ventricle              | RELA -like         | III              | negative                         | no match (low score for methylation class plexus tumor, 0.54)                        | n.a.                       | ST EP, RELA -like              | HIT-2000 study protocol             | 7,62  | relapse    | 7,62      | dead              | this study       | 1  |
| 17                | 4,2    | f        | hemispheric                | RELA -like         | III              | negative                         | no match (borderline score for methylation class ependymoma, RELA fusion, 0.89)      | n.a.                       | ST EP, RELA -like              | HIT-2000 study protocol             | 11,68 | censored   | 11,68     | alive             | this study       | 2  |
| 18                | 1,9    | f        | hemispheric                | RELA -like         | III              | negative                         | no match                                                                             | n.a.                       | ST EP, RELA -like              | HIT-2000 study protocol             | 7,68  | censored   | 7,68      | alive             | this study       | 3  |
| 19                | 7,2    | f        | pineal region              | RELA -like         | III              | negative                         | no match (low score for methylation class plexus tumor, 0.49)                        | C11orf95-NCOA1             | ST EP, RELA -like              | HIT-2000 study protocol             | 8,53  | censored   | 8,53      | alive             | this study       | 4  |
| 20                | 17,3   | m        | hemispheric                | RELA -like         | III              | negative                         | ependymoma, RELA fusion                                                              | C11orf95-NCOA1, RTN3-NCOA1 | ST EP, RELA -like              | VEC-Chemotherapy; UKCCSG/SIOP study | 7,23  | censored   | 7,23      | alive             | this study       | 5  |
| 21                | 0,5    | m        | lateral ventricle          | RELA -like         | III              | negative                         | no match                                                                             | n.a.                       | ST EP, RELA -like              | HIT-2000 study protocol             | 4,9   | relapse    | 5,6       | dead              | this study       | 6  |
| 22                | 4,2    | f        | lateral ventricle          | RELA -like         | III              | negative                         | ependymoma, RELA fusion                                                              | n.a.                       | ST EP, RELA -like              | HIT-2000 study protocol             | 5,49  | censored   | 5,49      | alive             | this study       | 7  |
| 23                | 6,6    | m        | hemispheric                | RELA -like         | III              | negative                         | no match                                                                             | PLAGL1-EWSR1               | ST EP, RELA -like              | HIT-2000 study protocol             | 7,48  | censored   | 7,48      | alive             | this study       | 8  |
| 24                | 2,3    | m        | hemispheric                | RELA -like         | III              | negative                         | no match (low score for methylation class ependymoma, RELA fusion, 0.62)             | n.a.                       | ST EP, RELA -like              | n.a.                                | n.a.  | n.a.       | n.a.      | n.a.              | this study       | 9  |
| 25                | 15     | m        | 3rd ventricle              | tanycytic          | II               | negative                         | no match (low score for methylation class plexus tumor, 0.61)                        | n.a.                       | ST EP, tanycytic               | HIT-2000 study protocol             | 10,4  | censored   | 10,4      | alive             | this study       | 10 |
| 26                | 13,6   | f        | hemispheric                | tanycytic          | III              | negative                         | no match (low score for methylation class subependymoma, posterior fossa, 0.39)      | n.a.                       | ST EP, tanycytic               | I-HIT-MED                           | 5,58  | censored   | 5,58      | alive             | this study       | 11 |
| 27                | 14,9   | m        | hemispheric                | tanycytic          | II               | negative                         | no match                                                                             | n.a.                       | ST EP, tanycytic               | I-HIT-MED                           | 3,38  | censored   | 3,38      | alive             | this study       | 12 |
| 28                | 6,9    | f        | hemispheric                | tanycytic          | II               | negative                         | no match (low score for methylation class subependymoma, spinal, 0.32)               | n.a.                       | ST EP, tanycytic               | n.a.                                | n.a.  | n.a.       | n.a.      | n.a.              | this study       | 13 |
| 29                | 17,8   | m        | hemispheric                | tanycytic          | II               | negative                         | no match                                                                             | n.a.                       | ST EP, tanycytic               | Irradiation                         | 2,8   | censored   | 2,8       | alive             | this study       | 14 |
| 30                | 10,3   | f        | pineal region              | tanycytic          | II               | negative                         | no match (low score for methylation class ependymoma, posterior fossa group B, 0.56) | n.a.                       | ST EP, tanycytic               | Irradiation                         | 6,9   | censored   | 6,9       | alive             | this study       | 15 |
| 31                | 13,5   | f        | hemispheric                | astroblastoma-like | III              | negative                         | no match (low score for methylation class plexus tumor, 0.48)                        | PATZ1-MN1                  | ST EP, astroblastoma-like      | HIT-2000 study protocol             | 6,78  | censored   | 6,78      | alive             | this study       | 16 |
| 32                | 5,3    | f        | hemispheric                | astroblastoma-like | III              | negative                         | no match                                                                             | MYH9-SEC14L2, MTMR3-NCOA3  | ST EP, astroblastoma-like      | HIT-2000 study protocol             | 8,61  | censored   | 8,61      | alive             | this study       | 17 |
| 33                | 9,4    | m        | 3rd ventricle              | other              | III              | negative                         | ependymoma, posterior fossa group B                                                  | n.a.                       | ST EP, PF-B epigenetic profile | I-HIT-MED                           | 1,7   | censored   | 1,7       | alive             | this study       | 18 |

Dx=diagnosis, m=male, f=female, n.a.=not available/applicable, EP=ependymoma, ST=supratentorial, EFS=event-free survival, OS=overall survival

Supplementary Table 1. Summary of characteristics of published cases of non-RELA/non-YAP supratentorial ependymomas and this series.
